# Supplementary material for: Epigenetic associations of type 2 diabetes and BMI in an Arab population
Source: PubMed Central journal article supplement (PMC4730771; doi:10.1186/s13148-016-0177-6), 2016-01-28

# Boxplots of Red and Green color channels

a)

Log<sub>2</sub> intensity of both methylated and unmethylated probes

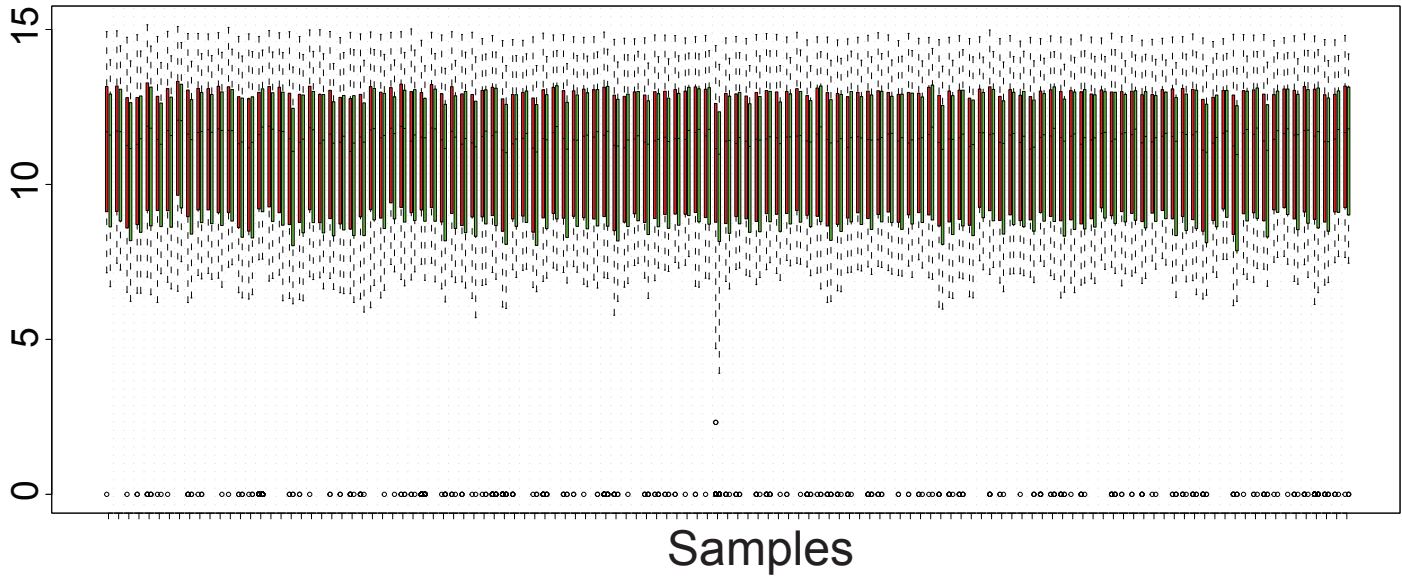

b)

Log<sub>2</sub> intensity of both methylated and unmethylated probes

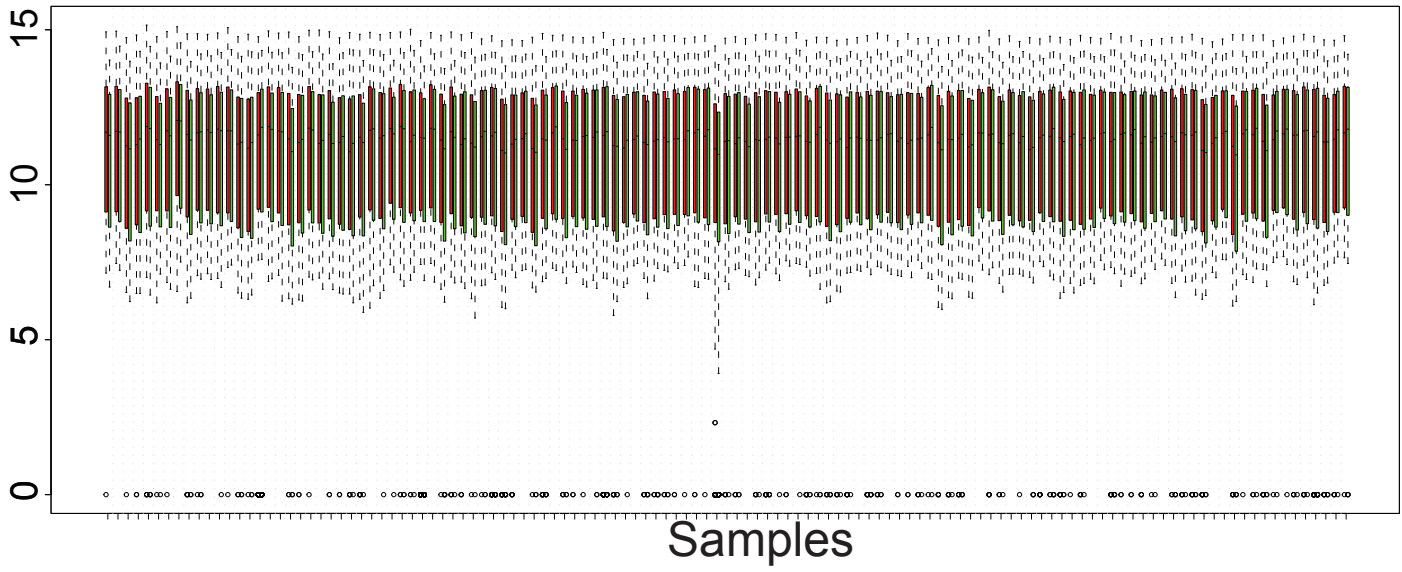

c)

Log<sub>2</sub> intensity of both methylated and unmethylated probes

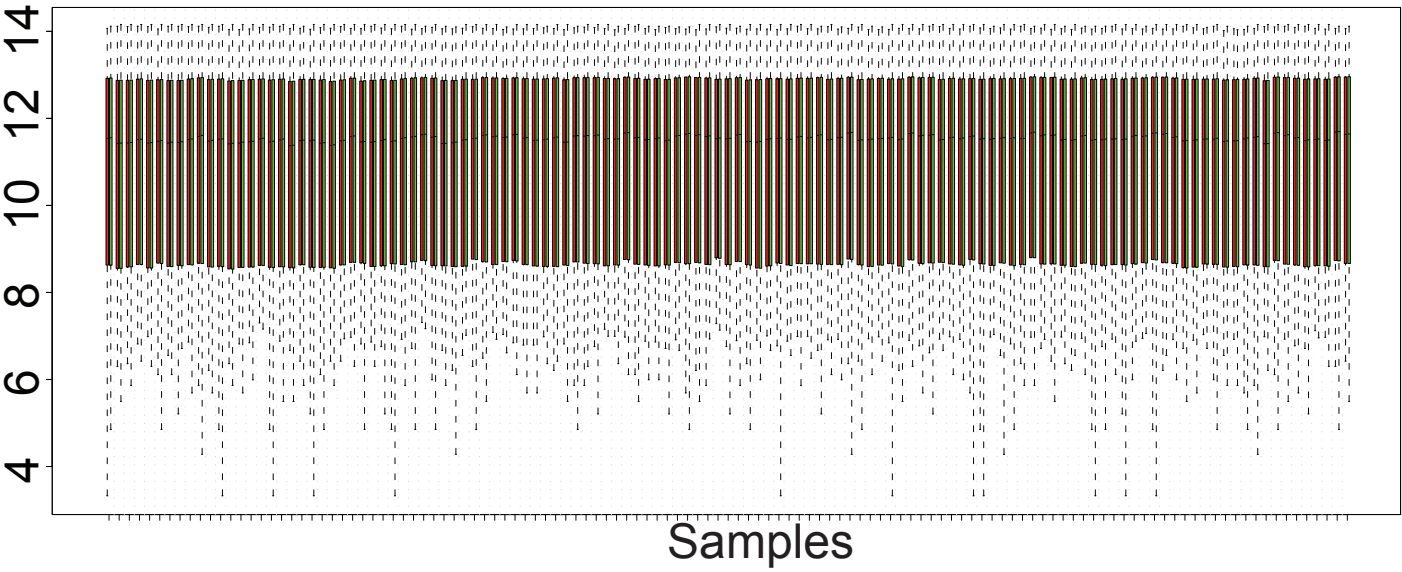

Supplement: 13148_2016_177_MOESM1_ESM.pdf [file 13148_2016_177_MOESM1_ESM.pdf]
